# Supplementary material for: How can strengthen the role of environmental education? Site-scale Ecological Virtual Laboratory enhance self-efficacy, which improve environmental information cognition and environmental awareness
Source: Research Square preprint supplement (doi:10.21203/rs.3.rs-7169354/v1), 2025-07-27
Supplement: Supplementary file 1 [file 97f13f8f3ef22cd54bd7a142.xlsx]

## Sheet: 计算数据
					Dependent variable 1: In-depth Cognitive of Environmental Information(EI)									Dependent variable 2: Enhance Environmental Awareness(EA)				Independent variable : Site-scale Ecological Virtual Laboratory				Mediator1 : Learning Motivation(LM)				Mediator2 : Self-efficacy(LM)					Mediator3 : Cognitive Load(CL)
Number	Time	Total points	Major	Age	EI1	EI2	EI3	EI4	EI5	EI6	EI7	EI8	EI9	EA1	EA2	EA3	EA4	SEVL1	SEVL2	SEVL3	SEVL4	LM1	LM2	LM3	LM4	SE1	SE2	SE3	SE4	SE5	CL1	CL2	CL3
1	775s	134	Landscape architecture	22	3	4	4	4	4	4	4	3	4	4	3	3	4	5	5	5	4	4	3	3	4	4	5	5	5	5	3	3	4
2	208s	145	Landscape architecture	20	5	5	5	5	5	5	5	5	5	5	5	5	5	5	5	5	5	5	5	5	5	5	5	5	5	5	5	5	5
3	205s	116	Landscape architecture	20	4	4	3	3	3	3	4	3	3	4	3	4	4	4	4	4	3	4	3	3	4	4	4	4	4	4	3	3	3
4	237s	130	Landscape architecture	19	3	4	4	4	4	4	4	4	3	5	5	5	5	5	5	5	5	5	5	4	4	4	5	4	5	4	3	3	4
5	209s	132	Landscape architecture	20	3	4	4	4	3	3	4	3	4	3	3	4	4	5	5	5	5	4	4	3	4	4	5	5	5	5	5	5	5
6	153s	136	Landscape architecture	20	5	5	5	5	5	5	5	5	5	5	5	5	5	4	4	4	4	4	4	4	3	5	5	5	5	4	4	3	3
7	208s	145	Landscape architecture	19	5	5	5	5	5	5	5	5	5	5	5	5	5	5	5	5	5	5	5	5	5	5	5	5	5	5	5	5	5
8	234s	135	Landscape architecture	20	5	3	5	4	4	4	5	5	5	5	5	5	5	5	5	5	4	4	4	4	3	5	5	5	5	5	5	5	5
9	330s	138	Landscape architecture	20	5	4	4	4	5	4	4	4	5	5	5	5	5	5	5	5	5	5	5	5	5	5	5	5	4	5	5	5	5
10	172s	121	Landscape architecture	19	4	4	4	3	3	4	4	3	4	5	5	5	5	5	4	5	5	5	5	3	5	4	4	3	3	4	4	4	3
11	85s	89	Landscape architecture	19	4	4	5	4	4	4	4	5	5	4	4	4	3	3	3	3	4	4	4	3	3	4	5	4	5	4	3	3	3
12	168s	115	Landscape architecture	20	4	3	4	4	4	3	4	4	4	3	4	3	4	4	3	3	3	5	5	5	4	4	4	4	4	4	3	4	4
13	1031s	145	Landscape architecture	20	5	5	5	5	5	5	5	5	5	5	5	5	5	5	5	5	5	5	5	5	5	5	5	5	5	5	5	5	5
14	255s	135	Landscape architecture	19	5	5	5	4	5	5	3	5	5	5	5	5	5	5	5	5	4	5	5	4	4	4	5	4	5	4	4	4	3
15	196s	129	Landscape architecture	20	4	3	3	4	3	3	3	3	4	5	4	5	5	4	4	4	4	5	5	5	4	4	5	4	4	4	5	4	5
16	156s	137	Landscape architecture	19	5	5	5	3	4	5	4	5	5	5	5	5	5	5	5	5	5	5	5	4	4	5	5	5	5	4	5	5	4
17	162s	128	Landscape architecture	20	3	3	3	4	4	4	3	3	4	5	4	5	5	5	4	4	4	4	4	4	4	4	4	3	3	3	5	5	4
18	74s	145	Landscape architecture	20	5	5	5	5	5	5	5	5	5	5	5	5	5	5	5	5	5	5	5	5	5	5	5	5	5	5	5	5	5
19	316s	143	Landscape architecture	19	5	5	5	5	5	5	5	4	5	5	5	4	5	5	5	5	5	5	5	5	5	5	5	5	5	5	5	5	5
20	583s	114	Landscape architecture	20	3	3	3	4	3	4	4	4	3	3	4	4	4	4	3	4	3	5	5	4	5	4	3	4	3	4	4	3	3
21	154s	127	Landscape architecture	19	5	5	4	4	4	5	5	5	5	4	4	4	3	4	4	4	4	4	4	3	3	4	4	3	3	4	5	5	5
22	142s	121	Landscape architecture	20	4	3	4	4	3	3	4	4	4	4	4	3	4	3	4	3	3	4	4	4	4	5	5	5	5	5	3	4	3
23	116s	129	Landscape architecture	19	3	4	3	3	3	3	4	3	4	5	4	4	5	5	4	5	5	4	4	4	3	5	4	5	5	4	4	3	3
24	110s	127	Landscape architecture	19	3	4	3	4	4	4	3	3	4	4	5	5	5	4	3	3	3	5	4	5	4	4	4	4	5	4	4	3	3
25	188s	133	Landscape architecture	20	3	3	4	3	3	4	3	4	4	4	4	3	4	5	4	5	4	5	4	5	4	5	4	5	5	5	3	3	3
26	179s	141	Landscape architecture	20	5	5	5	5	5	4	5	5	5	5	5	5	5	5	5	5	5	5	5	4	5	5	5	5	5	5	5	5	5
27	165s	145	Landscape architecture	19	5	5	5	5	5	5	5	5	5	5	5	5	5	5	5	5	5	5	5	5	5	5	5	5	5	5	5	5	5
28	376s	127	Landscape architecture	19	4	4	3	3	4	4	3	4	4	5	3	5	5	4	4	4	3	5	5	4	4	3	3	3	4	3	3	4	4
29	194s	145	Landscape architecture	20	5	5	5	5	5	5	5	5	5	5	5	5	5	5	5	5	5	5	5	5	5	5	5	5	5	5	5	5	5
30	255s	129	Landscape architecture	29	3	3	3	4	4	4	4	3	4	3	3	4	4	5	5	4	4	5	4	5	4	4	5	4	5	5	4	3	4
31	195s	141	Landscape architecture	20	5	5	5	5	4	4	4	5	5	5	5	4	5	5	5	5	5	5	5	5	5	5	5	5	5	5	5	5	5
32	328s	122	Landscape architecture	19	4	4	4	3	4	4	3	3	4	5	4	4	5	4	4	3	4	4	3	4	4	5	5	4	4	5	3	3	3
33	193s	145	Landscape architecture	19	5	5	5	5	5	5	5	5	5	5	5	5	5	5	5	5	5	5	5	5	5	5	5	5	5	5	5	5	5
34	86s	116	Landscape architecture	20	4	4	4	3	3	3	3	4	4	3	3	4	4	4	3	4	4	4	4	4	3	4	4	3	3	4	3	4	4
35	1009s	93	Landscape architecture	20	4	5	4	4	4	5	4	4	5	4	3	4	3	3	4	4	3	5	4	5	5	3	4	3	4	4	2	3	4
36	179s	145	Landscape architecture	19	5	5	5	5	5	5	5	5	5	5	5	5	5	5	5	5	5	5	5	5	5	5	5	5	5	5	5	5	5
37	166s	144	Landscape architecture	19	5	5	5	5	5	5	5	5	5	5	5	5	5	5	5	5	5	5	5	5	4	5	5	5	5	5	5	5	5
38	121s	143	Landscape architecture	19	5	5	5	5	5	5	5	5	5	5	5	5	5	5	5	5	5	5	5	4	5	5	5	4	5	5	5	5	5
39	271s	114	Landscape architecture	19	3	4	3	4	3	4	4	4	4	3	4	4	4	4	4	3	3	4	3	3	3	4	3	3	3	4	4	4	3
40	224s	142	Landscape architecture	20	5	5	5	5	5	5	5	5	5	5	5	5	5	5	5	5	5	5	5	5	4	5	5	5	5	4	5	4	5
41	235s	142	Landscape architecture	18	5	5	5	5	4	5	5	4	5	5	5	5	5	5	5	5	5	5	5	5	4	5	5	5	5	5	5	5	5
42	167s	134	Landscape architecture	19	3	4	4	4	4	3	4	4	4	3	3	3	4	4	3	3	4	5	5	4	4	5	4	5	5	5	3	4	4
43	303s	133	Landscape architecture	19	5	4	5	5	4	4	5	4	5	3	3	3	4	5	4	5	4	5	5	4	4	5	5	5	4	5	4	4	3
44	209s	143	Landscape architecture	20	5	5	4	5	5	5	5	5	5	5	5	5	5	5	5	5	5	5	5	5	4	5	5	5	5	5	5	5	5
45	229s	135	Landscape architecture	20	4	5	4	5	5	5	5	5	5	5	5	5	5	5	5	5	5	5	5	4	4	5	4	4	4	5	3	3	3
46	263s	141	Landscape architecture	20	5	5	5	5	5	5	4	5	5	5	5	5	5	5	5	5	5	5	5	4	4	5	5	5	5	4	5	5	5
47	198s	139	Landscape architecture	21	5	5	5	4	4	5	4	5	5	5	5	5	5	5	5	5	5	5	5	5	4	5	5	5	5	5	3	3	4
48	210s	138	Landscape architecture	19	4	3	3	4	4	3	4	4	4	5	5	5	5	5	5	5	5	5	5	5	4	5	5	5	5	5	3	4	3
49	183s	131	Landscape architecture	19	3	4	3	4	4	3	3	3	3	5	5	5	5	4	3	3	3	4	3	3	3	4	4	4	5	5	3	4	3
50	440s	126	Landscape architecture	20	5	4	4	4	4	4	4	4	5	5	5	5	5	4	3	4	3	4	3	4	4	4	5	4	4	4	4	4	3
51	173s	133	Landscape architecture	20	3	4	3	4	4	4	4	3	4	5	5	5	5	5	5	5	5	5	5	4	5	4	3	3	3	3	5	5	5
52	174s	142	Landscape architecture	20	5	5	5	5	4	5	5	5	5	5	5	5	5	5	5	5	5	5	5	5	4	5	4	5	5	5	5	5	5
53	172s	104	Landscape architecture	20	3	4	3	4	4	4	3	3	4	3	4	4	4	4	4	3	3	4	3	4	3	3	4	4	3	4	3	3	4
54	86s	126	Landscape architecture	20	3	4	4	3	4	3	3	3	4	3	3	4	4	5	5	4	4	5	5	5	4	5	5	4	4	5	3	3	4
55	130s	137	Landscape architecture	21	5	4	5	5	4	4	5	5	5	5	5	4	5	4	3	3	3	5	4	4	4	5	5	5	5	5	5	5	4
56	291s	145	Landscape architecture	19	5	5	5	5	5	5	5	5	5	5	5	5	5	5	5	5	5	5	5	5	5	5	5	5	5	5	5	5	5
57	241s	131	Landscape architecture	19	4	4	4	3	4	3	4	3	4	4	4	4	5	5	5	5	5	5	5	5	4	5	5	5	4	5	4	4	4
58	120s	145	Landscape architecture	20	5	5	5	5	5	5	5	5	5	5	5	5	5	5	5	5	5	5	5	5	5	5	5	5	5	5	5	5	5
59	164s	136	Landscape architecture	19	4	3	3	3	4	4	3	4	4	5	5	4	5	5	4	5	5	4	4	4	3	5	5	4	5	5	4	3	3
60	161s	126	Landscape architecture	21	4	5	5	4	4	5	4	5	5	5	5	5	5	4	4	3	3	5	5	5	4	4	4	3	3	3	4	4	4
61	1897s	110	Landscape architecture	19	3	4	4	4	3	3	3	3	4	4	4	4	4	3	3	4	3	4	4	3	4	5	4	4	3	4	2	3	4
62	219s	132	Landscape architecture	19	4	3	3	3	4	4	4	3	4	5	5	5	5	5	5	4	5	4	3	4	3	5	5	5	4	5	5	5	5
63	274s	131	Landscape architecture	20	5	4	4	4	4	4	5	5	5	5	5	5	5	5	5	5	4	4	4	4	4	4	3	3	4	4	5	5	5
64	191s	127	Landscape architecture	19	4	3	3	4	4	4	3	3	3	3	3	4	4	4	4	4	4	5	3	5	5	4	5	5	5	5	5	4	5
65	275s	135	Landscape architecture	18	4	3	4	4	3	4	4	3	4	5	5	5	5	4	3	4	4	5	5	5	4	5	4	5	5	5	3	4	3
66	458s	140	Landscape architecture	19	3	3	3	3	3	4	3	3	4	5	5	5	5	5	5	5	5	5	5	5	4	5	5	5	5	5	4	4	3
67	116s	145	Landscape architecture	20	5	5	5	5	5	5	5	5	5	5	5	5	5	5	5	5	5	5	5	5	5	5	5	5	5	5	5	5	5
68	197s	116	Landscape architecture	19	4	4	4	3	3	4	4	3	4	3	3	3	4	4	3	4	3	4	4	4	4	4	4	4	4	4	4	4	3
69	109s	145	Landscape architecture	20	5	5	5	5	5	5	5	5	5	5	5	5	5	5	5	5	5	5	5	5	5	5	5	5	5	5	5	5	5
70	108s	143	Landscape architecture	19	5	5	5	5	5	5	5	5	5	5	5	5	5	5	5	5	5	5	5	4	5	5	5	5	4	5	5	5	5
71	296s	130	Landscape architecture	19	3	4	4	4	3	4	3	4	4	5	4	4	5	4	3	4	3	5	4	4	4	5	5	5	5	5	3	4	4
72	155s	116	Landscape architecture	19	4	3	3	4	4	3	3	3	4	4	4	4	4	4	3	3	3	5	4	5	4	5	5	5	5	5	3	3	4
73	110s	141	Landscape architecture	19	5	5	4	5	5	5	5	5	5	4	5	5	5	5	5	5	5	4	3	4	3	5	5	5	5	4	5	5	5
74	175s	145	Landscape architecture	20	5	5	5	5	5	5	5	5	5	5	5	5	5	5	5	5	5	5	5	5	5	5	5	5	5	5	5	5	5
75	225s	140	Landscape architecture	19	5	5	4	5	5	4	5	5	5	5	5	5	5	5	4	5	5	5	5	4	5	5	5	5	4	5	5	5	5
76	346s	145	Landscape architecture	19	5	5	5	5	5	5	5	5	5	5	5	5	5	5	5	5	5	5	5	5	5	5	5	5	5	5	5	5	5
77	467s	126	Landscape architecture	19	4	4	4	3	3	3	4	4	4	3	4	4	4	4	4	4	3	3	3	4	4	4	3	4	3	4	4	3	4
78	429s	108	Landscape architecture	19	4	5	4	5	5	5	4	5	5	3	4	3	4	4	3	3	4	4	3	4	4	4	4	3	4	3	3	3	4
79	289s	139	Landscape architecture	20	5	4	5	4	5	5	5	5	5	5	5	5	5	5	5	4	5	5	4	5	4	5	4	5	5	5	5	5	5
80	154s	138	Landscape architecture	19	4	5	5	5	4	5	5	5	5	5	5	5	5	4	4	4	4	5	4	4	5	5	5	5	5	5	4	3	4
81	276s	132	Landscape architecture	19	4	4	4	4	5	5	5	4	5	5	5	5	5	4	4	4	5	3	3	3	3	5	5	5	5	5	5	5	5
82	187s	131	Landscape architecture	20	3	4	4	3	4	4	4	4	4	3	3	4	4	5	5	4	4	4	4	3	4	5	4	4	5	5	4	4	4
83	306s	145	Landscape architecture	19	5	5	5	5	5	5	5	5	5	5	5	5	5	5	5	5	5	5	5	5	5	5	5	5	5	5	5	5	5
84	242s	125	Landscape architecture	20	4	3	4	3	4	3	4	4	4	5	5	5	5	3	4	4	5	4	4	4	3	5	5	5	5	4	4	3	4
85	170s	141	Landscape architecture	20	5	5	4	5	5	4	5	5	5	5	5	5	5	5	5	5	5	5	5	5	4	5	5	5	5	5	3	4	4
86	102s	142	Landscape architecture	20	3	3	3	4	4	4	4	3	4	5	5	5	5	5	5	5	5	5	5	5	5	5	5	5	5	5	5	5	5
87	1249s	142	Landscape architecture	19	5	4	4	4	5	5	5	5	5	5	5	5	5	5	5	5	5	5	5	5	5	5	5	5	5	5	5	5	5
88	196s	142	Landscape architecture	20	5	4	5	5	5	5	5	5	5	5	5	5	5	5	5	5	5	4	3	4	4	5	5	5	5	5	5	5	5
89	143s	121	Landscape architecture	19	3	3	3	4	3	4	3	3	4	5	5	5	5	5	4	5	4	4	4	4	4	5	4	5	4	4	4	4	3
90	1082s	145	Landscape architecture	19	5	5	5	5	5	5	5	5	5	5	5	5	5	5	5	5	5	5	5	5	5	5	5	5	5	5	5	5	5
91	393s	133	Landscape architecture	19	5	4	4	5	4	4	5	5	5	5	4	5	5	5	4	4	5	5	5	4	4	5	5	5	3	5	5	5	4
92	207s	145	Landscape architecture	20	5	5	5	5	5	5	5	5	5	5	5	5	5	5	5	5	5	5	5	5	5	5	5	5	5	5	5	5	5
93	194s	113	Landscape architecture	18	5	5	5	5	5	5	5	5	5	5	5	5	5	1	1	1	1	5	5	5	5	5	5	5	5	5	5	5	5
94	188s	124	Landscape architecture	21	3	4	3	3	4	4	3	4	4	4	4	4	4	4	5	5	4	4	4	4	4	4	4	3	3	4	4	3	4
95	497s	141	Landscape architecture	18	5	5	5	4	5	4	4	5	5	5	5	5	5	5	5	5	5	5	5	5	5	5	5	5	5	5	4	4	4
96	498s	132	Landscape architecture	20	4	3	3	4	3	3	4	3	4	4	3	3	4	5	4	5	4	5	4	5	4	5	4	5	4	5	4	4	4
97	340s	133	Landscape architecture	19	3	3	3	3	4	3	4	4	4	3	4	3	4	5	4	4	4	4	3	3	3	5	4	4	5	5	5	5	5
98	174s	145	Landscape architecture	19	5	5	5	5	5	5	5	5	5	5	5	5	5	5	5	5	5	5	5	5	5	5	5	5	5	5	5	5	5
99	103s	145	Landscape architecture	19	5	5	5	5	5	5	5	5	5	5	5	5	5	5	5	5	5	5	5	5	5	5	5	5	5	5	5	5	5
100	303s	120	Landscape architecture	20	4	3	3	4	3	4	3	3	4	3	4	4	3	4	5	4	4	4	3	4	3	5	4	4	4	5	5	4	5
101	163s	111	Landscape architecture	19	4	3	3	4	3	3	3	3	4	4	4	5	5	5	5	4	5	4	3	4	3	3	3	4	4	3	3	4	4
102	870s	142	Landscape architecture	19	5	5	4	5	4	4	5	5	5	5	5	5	5	5	5	5	5	5	5	5	5	5	5	5	5	5	5	5	5
103	152s	136	Landscape architecture	20	4	4	3	3	3	4	3	3	4	5	5	4	5	5	4	5	5	4	3	3	3	5	5	4	5	5	3	4	3
104	254s	133	Landscape architecture	19	3	3	4	3	3	4	4	4	4	5	4	5	5	5	5	5	5	4	3	3	4	5	5	5	5	5	5	4	5
105	312s	141	Landscape architecture	20	3	3	4	3	4	4	4	4	4	5	5	5	5	5	5	5	5	5	5	5	4	5	5	5	5	5	5	5	5
106	173s	145	Landscape architecture	19	5	5	5	5	5	5	5	5	5	5	5	5	5	5	5	5	5	5	5	5	5	5	5	5	5	5	5	5	5
107	174s	138	Landscape architecture	19	4	3	4	4	4	3	4	3	4	5	5	5	5	5	4	5	5	4	4	4	3	5	5	5	5	5	5	4	5
108	260s	131	Landscape architecture	19	4	4	3	4	5	5	5	4	5	4	5	5	5	5	5	4	4	4	4	3	4	5	5	5	5	5	3	3	3
109	144s	140	Landscape architecture	19	3	3	4	3	3	4	3	4	4	5	5	5	5	5	5	5	5	5	5	4	4	5	5	4	5	5	5	5	5
110	184s	115	Landscape architecture	20	4	4	4	3	4	3	4	4	4	4	3	3	3	4	5	3	5	4	4	4	3	4	3	4	3	4	4	4	4
111	181s	122	Landscape architecture	19	4	4	3	3	4	3	3	4	4	5	5	4	5	5	4	5	4	3	4	4	3	3	3	3	3	4	5	5	5
112	263s	125	Landscape architecture	20	3	3	3	3	4	4	3	4	4	3	4	4	4	5	4	5	5	3	4	3	3	4	4	3	3	4	4	4	4
113	103s	145	Landscape architecture	20	5	5	5	5	5	5	5	5	5	5	5	5	5	5	5	5	5	5	5	5	5	5	5	5	5	5	5	5	5
114	612s	123	Landscape architecture	20	3	3	3	4	3	4	4	3	3	5	5	5	5	4	4	5	4	3	4	4	4	4	4	3	3	4	5	4	5
115	182s	136	Landscape architecture	19	4	5	4	4	4	4	4	4	5	5	4	5	5	5	5	5	5	5	5	5	4	5	5	5	5	5	5	5	5
116	133s	127	Landscape architecture	19	4	3	4	3	3	3	3	4	4	4	4	5	5	5	4	4	5	5	5	4	5	4	4	4	3	4	3	4	3
117	152s	145	Landscape architecture	20	5	5	5	5	5	5	5	5	5	5	5	5	5	5	5	5	5	5	5	5	5	5	5	5	5	5	5	5	5
118	113s	118	Landscape architecture	19	3	4	4	3	4	3	3	3	3	5	5	5	5	4	4	4	4	4	4	3	3	4	3	3	3	3	3	4	3
119	143s	113	Landscape architecture	19	5	4	5	4	4	4	5	5	5	4	4	3	4	4	4	3	4	4	3	4	3	4	3	3	4	3	5	4	4
120	156s	145	Landscape architecture	19	5	5	5	5	5	5	5	5	5	5	5	5	5	5	5	5	5	5	5	5	5	5	5	5	5	5	5	5	5
121	175s	130	Landscape architecture	19	3	4	4	3	3	4	4	3	4	3	3	3	4	5	4	5	4	5	4	5	4	5	4	5	4	5	3	4	4
122	229s	121	Landscape architecture	20	4	4	4	4	4	4	4	5	5	4	4	3	3	4	4	4	5	5	4	3	5	4	5	4	4	5	5	4	4
123	407s	112	Landscape architecture	20	3	4	4	4	4	3	4	4	3	3	3	4	4	4	5	4	4	4	4	4	4	4	3	4	4	3	4	4	4
124	136s	130	Landscape architecture	19	4	4	4	4	3	4	4	3	4	4	4	3	4	5	4	4	5	5	4	4	5	5	4	5	4	4	3	3	3
125	102s	133	Landscape architecture	20	4	4	3	4	5	5	5	4	5	4	4	4	4	4	5	4	5	5	5	5	5	5	5	5	5	5	5	5	4
126	302s	143	Landscape architecture	19	5	5	5	5	5	5	5	5	5	5	5	5	5	5	5	5	5	5	5	5	4	5	5	5	5	4	5	5	5
127	230s	137	Landscape architecture	19	4	4	3	3	3	3	4	3	4	5	5	5	5	5	5	5	5	5	5	5	4	4	5	4	5	5	5	5	5
128	107s	116	Landscape architecture	19	3	4	3	4	3	4	4	4	4	3	3	4	4	4	4	4	4	4	4	3	3	4	3	3	4	4	4	4	4
129	207s	126	Landscape architecture	19	3	3	3	3	3	3	3	4	3	5	5	5	4	5	5	5	5	4	4	4	4	4	4	4	4	3	5	5	5
130	202s	124	Landscape architecture	20	4	4	4	3	4	3	3	4	4	5	4	5	4	4	5	5	5	4	3	3	3	4	5	4	4	4	4	3	4
131	199s	101	Landscape architecture	20	4	3	3	3	3	3	3	3	4	4	4	4	4	4	4	4	4	3	3	3	3	3	3	3	3	3	2	2	3
132	137s	142	Landscape architecture	19	5	5	5	5	5	5	5	5	5	5	5	5	5	5	4	5	5	5	5	4	4	5	5	5	5	5	5	5	5
133	345s	119	Landscape architecture	19	4	5	4	3	4	4	4	4	4	5	4	5	4	4	4	4	4	4	4	4	3	4	3	3	4	3	4	3	4
134	221s	128	Landscape architecture	20	4	4	4	3	4	4	3	4	3	5	5	5	5	5	4	5	5	5	5	4	5	5	5	4	4	5	4	4	4
135	159s	122	Landscape architecture	19	4	5	3	4	5	3	5	5	3	5	5	5	5	3	3	4	5	5	5	5	5	5	5	4	3	3	2	2	2
136	247s	136	Landscape architecture	20	5	5	4	4	5	5	5	5	4	5	5	5	5	5	5	4	5	5	5	4	5	5	4	5	5	5	3	4	3
137	508s	138	Landscape architecture	20	5	4	4	4	4	4	4	5	4	5	5	5	5	5	5	5	5	5	5	5	5	5	5	5	5	5	5	5	5
138	397s	136	Landscape architecture	19	5	4	4	5	5	4	5	4	5	5	5	4	5	5	5	4	5	5	5	4	4	5	5	5	4	5	5	5	5
139	155s	131	Landscape architecture	19	4	4	4	4	4	4	4	4	4	5	5	5	4	5	5	4	5	5	5	5	5	5	5	5	4	4	3	4	3
140	140s	136	Landscape architecture	19	5	5	5	4	5	4	5	4	5	4	5	5	5	5	5	4	5	5	4	5	5	5	4	5	5	4	5	4	5
141	284s	135	Landscape architecture	20	5	4	5	4	4	4	5	5	4	5	5	5	5	5	4	5	5	5	5	4	5	5	4	5	5	5	4	3	3
142	181s	131	Landscape architecture	19	5	5	5	5	5	5	5	5	5	5	5	5	5	5	5	4	4	4	4	4	4	4	4	4	4	4	4	3	3
143	188s	138	Landscape architecture	21	5	5	5	5	5	4	4	4	5	4	5	5	5	4	4	5	5	5	5	5	5	5	5	5	4	5	5	5	5
144	381s	98	Landscape architecture	20	3	2	2	1	4	5	4	4	4	5	5	4	4	3	3	3	4	5	5	5	5	5	5	4	5	4	3	3	3
145	170s	127	Landscape architecture	20	4	4	4	4	4	4	4	4	4	4	4	4	4	4	4	4	5	4	4	5	5	5	5	5	5	5	5	5	5
146	263s	137	Landscape architecture	20	5	4	4	4	5	4	5	5	5	5	5	5	5	5	5	5	5	5	5	4	4	5	5	5	4	5	5	4	5
